# Supplementary material
Source: PubMed Central journal article supplement (PMC2972323)
Supplement: 091711_1.pdf [file 091711_1.pdf]

**APPENDIX 1 (as supplied by the authors): Percentage of the 261 patients with herpes zoster reporting pain interference  $\geq 5$  in their activities of daily living according to age.**

|                                                                                            | Recruitment         | 30 days              | 90 days            | 180 days           |
|--------------------------------------------------------------------------------------------|---------------------|----------------------|--------------------|--------------------|
|                                                                                            | % (95% CI)          | % (95% CI)           | % (95% CI)         | % (95% CI)         |
| <b>Proportion with pain interference <math>\geq 5</math> in activities of daily living</b> |                     |                      |                    |                    |
| <b>General activities</b>                                                                  |                     |                      |                    |                    |
| All                                                                                        | 52.6 (45.0 – 61.4)  | 19.8 (15.8 – 24.7)   | 6.2 (3.7 – 10.3)   | 4.0 (2.4 – 6.9)    |
| 49 – 60 yrs                                                                                | 47.3 (36.1 – 61.9)  | 14.4 ( 9.4 – 23.0)   | 0.9 (0.1 – 7.7)    | 0.5 (0.1 – 4.1)    |
| 61 – 70 yrs                                                                                | 61.1 (47.5 – 78.7)  | 25.4 (18.0 – 35.8) * | 11.2 (5.4 – 23.5)* | 3.5 (1.4 – 9.1)*   |
| 71 – 96 yrs                                                                                | 51.0 (38.4 – 67.8)  | 21.3 (14.6 – 31.0)   | 8.6 (4.4 – 17.1)*  | 8.5 (4.4 – 16.6)*  |
| <b>Mood</b>                                                                                |                     |                      |                    |                    |
| All                                                                                        | 45.9 (38.6 – 54.7)  | 17.3 (13.6 – 21.9)   | 6.9 (4.3 – 11.3)   | 4.4 (2.5 – 7.7)    |
| 49 – 60 yrs                                                                                | 45.9 (34.5 – 61.2)  | 12.9 ( 8.3 – 20.0)   | 1.9 (0.5 – 7.2)    | 0.8 (0.2 – 4.1)    |
| 61 – 70 yrs                                                                                | 54.6 (41.9 – 71.2)  | 22.1 (15.5 – 31.4)*  | 12.0 (5.8 – 24.8)* | 3.7 (1.5 – 9.7)    |
| 71 – 96 yrs                                                                                | 38.1 (26.5 – 54.8)  | 18.6 (12.0 – 28.8)   | 8.9 (4.5 – 17.9)*  | 9.3 (4.6 – 18.8)*  |
| <b>Walking ability</b>                                                                     |                     |                      |                    |                    |
| All                                                                                        | 28.9 (22.7 – 36.8)  | 9.7 (7.0 – 13.6)     | 6.3 (3.6 – 10.9)   | 3.4 (1.8 – 6.4)    |
| 49 – 60 yrs                                                                                | 20.5 (12.2 – 34.3)  | 6.9 (3.5 – 13.7)     | 2.1 (0.5 – 9.4)    | 0.3 (0.0 – 3.1)    |
| 61 – 70 yrs                                                                                | 34.2 (23.2 – 50.4)  | 13.3 (8.1 – 21.9)    | 9.3 (3.7 – 23.4)*  | 1.5 (0.4 – 6.2)    |
| 71 – 96 yrs                                                                                | 34.9 (24.2 – 50.5)  | 10.0 (5.5 – 17.7)    | 9.4 (4.5 – 19.7)*  | 9.0 (4.6 – 17.6) † |
| <b>Normal work</b>                                                                         |                     |                      |                    |                    |
| All                                                                                        | 44.8 (37.5 – 53.6)  | 15.5 (11.9 – 20.0)   | 5.5 (3.2 – 9.2)    | 4.2 (2.5 – 7.2)    |
| 49 – 60 yrs                                                                                | 39.8 (28.7 – 55.0)  | 12.3 (7.5 – 20.2)    | 1.5 (0.2 – 9.1)    | 0.5 (0.1 – 4.2)    |
| 61 – 70 yrs                                                                                | 58.1 (44.5 – 75.8)* | 16.4 (10.8 – 25.1)   | 8.4 (3.7 – 18.9)*  | 3.2 (1.1 – 9.1)    |
| 71 – 96 yrs                                                                                | 38.7 (27.5 – 54.3)  | 19.2 (12.5 – 29.5)   | 8.1 (4.1 – 16.3)*  | 9.4 (5.0 – 17.7)*  |
| <b>Relations with others</b>                                                               |                     |                      |                    |                    |
| All                                                                                        | 31.2 (24.9 – 39.1)  | 13.4 (10.0 – 18.1)   | 4.8 (2.7 – 8.5)    | 3.3 (1.8 – 5.9)    |
| 49 – 60 yrs                                                                                | 33.5 (23.0 – 48.6)  | 9.9 (5.8 – 16.9)     | 1.8 (0.5 – 6.6)    | 0.3 (0.0 – 2.6)    |
| 61 – 70 yrs                                                                                | 36.3 (25.2 – 52.2)  | 14.6 (8.9 – 23.8)    | 8.7 (3.6 – 20.9)*  | 3.6 (1.3 – 10.0)*  |
| 71 – 96 yrs                                                                                | 24.3 (16.0 – 37.0)  | 17.5 (10.5 – 29.1)   | 5.2 (2.2 – 12.2)   | 6.4 (2.9 – 12.9)*  |
| <b>Sleep</b>                                                                               |                     |                      |                    |                    |
| All                                                                                        | 63.9 (56.0 – 73.0)  | 19.4 (15.5 – 24.3)   | 7.9 (5.0 – 12.5)   | 3.3 (1.8 – 6.2)    |
| 49 – 60 yrs                                                                                | 64.9 (52.5 – 80.4)  | 14.4 (9.2 – 22.5)    | 2.0 (0.4 – 10.4)   | 0.1 (0.0 – 0.6)    |
| 61 – 70 yrs                                                                                | 70.8 (58.0 – 86.4)  | 23.6 (16.5 – 34.0)   | 11.5 (5.6 – 23.9)* | 3.9 (1.6 – 9.8)*   |
| 71 – 96 yrs                                                                                | 56.5 (42.8 – 74.5)  | 22.4 (15.5 – 32.4)   | 12.2 (6.9 – 21.4)* | 6.4 (2.8 – 14.9)*  |
| <b>Enjoyment of life</b>                                                                   |                     |                      |                    |                    |
| All                                                                                        | 58.2 (50.5 – 67.2)  | 20.2 (16.2 – 25.3)   | 7.6 (4.9 – 11.8)   | 4.7 (2.8 – 7.8)    |
| 49 – 60 yrs                                                                                | 54.7 (43.0 – 69.5)  | 15.8 (10.6 – 23.6)   | 3.0 (1.0 – 8.5)    | 0.4 (0.0 – 2.0)    |
| 61 – 70 yrs                                                                                | 67.8 (54.8 – 83.7)  | 23.7 (16.5 – 34.1)   | 7.9 (3.3 – 16.6)   | 5.0 (2.0 – 12.2)*  |
| 71 – 96 yrs                                                                                | 53.8 (40.2 – 72.2)  | 22.8 (15.3 – 33.9)   | 13.4 (7.8 – 23.0)* | 9.4 (5.0 – 17.7)*  |

\* p-value < 0.05 for comparison with 49-60

† p-value < 0.05 for comparison with 49-60 and 61-70

‡ p-value < 0.05 for comparison with 61-70
