# Supplementary material
Source: PubMed Central journal article supplement (PMC2972323)
Supplement: 091711_2.pdf [file 091711_2.pdf]

**APPENDIX 2 (as supplied by the authors): Duration of the impact of herpes zoster pain on specific EQ-5D health domains and on the activities of daily living of 261 patients with herpes zoster**

|                                                                 | Impaired at recruitment * | Duration (days) † |             |             |
|-----------------------------------------------------------------|---------------------------|-------------------|-------------|-------------|
|                                                                 | n                         | Median            | 95% CI      | Q1 – Q3     |
| <b>Herpes zoster pain</b>                                       | 261                       | 32.5              | 30.5 – 44.0 | 23.5 – 80.0 |
| <b>Pain interference with activities of daily living (ZBPI)</b> |                           |                   |             |             |
| General activities                                              | 225                       | 29.7              | 28.0 – 32.0 | 19.5 – 56.0 |
| Mood                                                            | 233                       | 28.5              | 27.0 – 30.5 | 18.5 – 50.5 |
| Walking ability                                                 | 160                       | 28.5              | 26.5 – 29.5 | 16.5 – 47.6 |
| Normal work                                                     | 210                       | 29.0              | 28.0 – 31.5 | 19.5 – 50.0 |
| Relations with others                                           | 196                       | 27.0              | 22.6 – 29.0 | 14.5 – 48.0 |
| Sleep                                                           | 230                       | 29.8              | 28.5 – 33.5 | 20.5 – 57.5 |
| Enjoyment of life                                               | 231                       | 28.8              | 27.0 – 30.5 | 20.5 – 50.5 |

Note: ZBPI = Zoster Brief Pain Inventory.

\* Kaplan-Meier curves were restricted to subjects who reported impairment in specific health domains or pain-interference in specific activities of daily living at recruitment.

† Calculated from rash onset until the end of the pain interference in the activities of daily living, defined as the first of two consecutive questionnaires with herpes zoster pain interference = 0 before 30 days or herpes zoster pain interference = 0, 1, 2 after 30 days.
